# Supplementary material for: Rh,Sb-codoped SrTiO 3 cubic nanoparticles encapsulated by ZnIn 2 S 4 nanosheets for efficient visible-light-driven hydrogen evolution
Source: Royal Society of Chemistry journal article supplement (doi:10.1039/d5dt02148k), 2025-01-01
Supplement: d5dt02148k1.pdf [file d5dt02148k1.pdf]

## Supplementary Information

### Rh,Sb-codoped $\text{SrTiO}_3$ cubic nanoparticles encapsulated by $\text{ZnIn}_2\text{S}_4$ nanosheets for efficient visible-light-driven hydrogen evolution

Junzhe Jiang<sup>a,b</sup>, Yiquan Zhan<sup>a,b</sup>, Bingxue Li<sup>a</sup>, Quan Li<sup>c</sup>, Yongsheng Liu<sup>a,b,\*</sup>, Jinbiao Liu<sup>a,\*</sup>, Liqing Li<sup>a,b,\*</sup>, Yoshihisa Sakata<sup>d</sup>

<sup>a</sup> Jiangxi Province Key Laboratory of Functional Crystalline Materials Chemistry, School of Chemistry and Chemical Engineering, Jiangxi University of Science and Technology, Ganzhou 341000, Jiangxi Province, China

<sup>b</sup> Yichun Lithium New Energy Industry Research Institute, Jiangxi University of Science and Technology, Yichun 336023, Jiangxi Province, China

<sup>c</sup> School of Energy and Mechanical Engineering, Jiangxi University of Science and Technology, Nanchang 330013, Jiangxi Province, China

<sup>d</sup> Graduate School of Sciences and Technology for Innovation, Yamaguchi University, Ube 755-8611, Yamaguchi Prefecture, Japan

\* Corresponding authors.

Email address:

lys90s@126.com (Y. Liu), liujinbiao@jxust.edu.cn (J. Liu), liliqing79@126.com (L. Li)

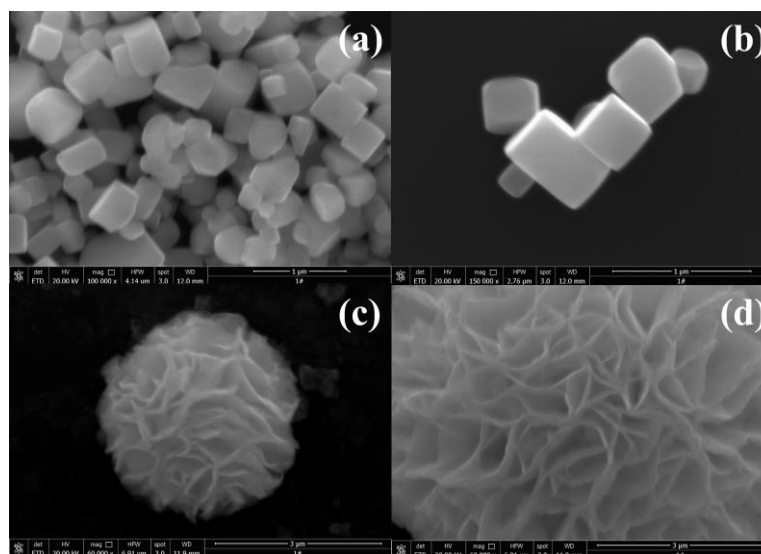

**Fig. S1.** SEM images for (a,b) Rh,Sb-STO and (c,d) pristine ZIS samples.

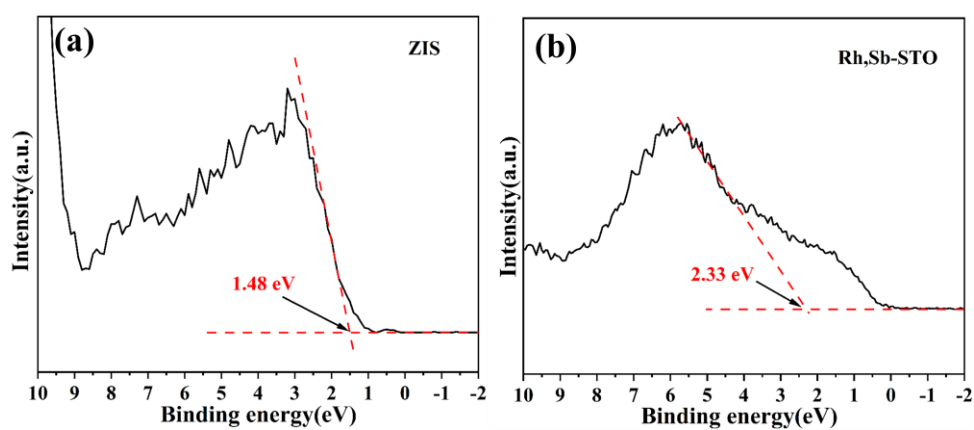

**Fig. S2.** VB XPS spectra of (a) pristine ZIS and (b) Rh,Sb-STO.

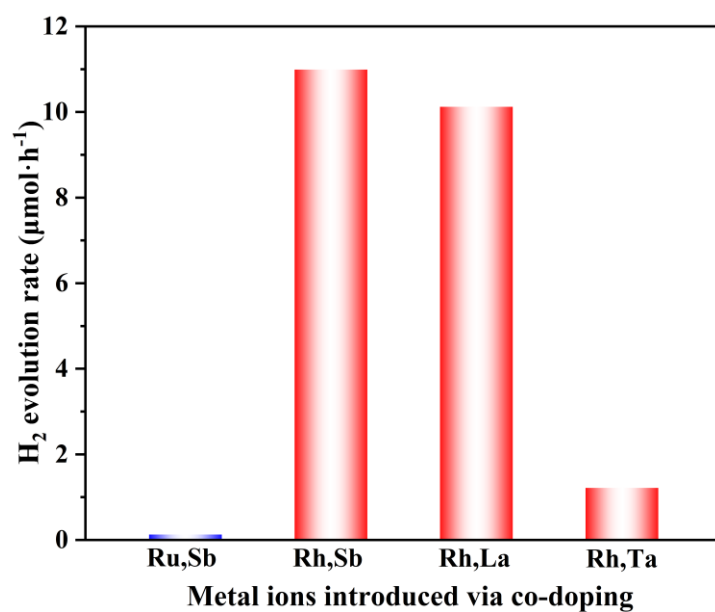

**Fig. S3.** Influence of doping metal ion pair on the photocatalytic hydrogen evolution rates over STO with 0.05 wt.% Pt. All the doping concentration of metal ion were maintained at 2 mol%.

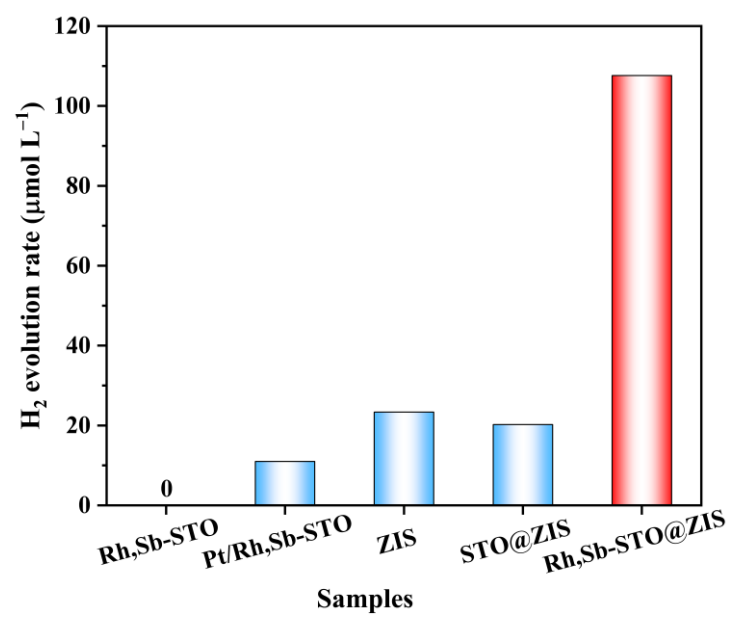

**Fig. S4.** Photocatalytic H<sub>2</sub> evolution rate over ZIS, 0.5STO@ZIS, and 0.5Rh,Sb-STO@ZIS samples under visible light irradiation.

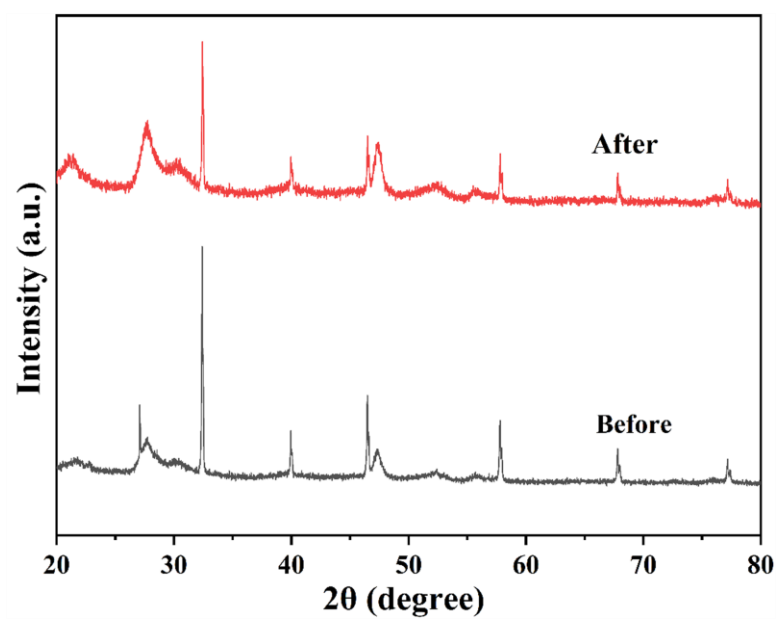

**Fig. S5.** XRD patterns of 0.5Rh,Sb-STO/ZIS before and after photocatalytic H<sub>2</sub>O splitting reaction.
